# Supplementary material for: Proximal tubular RAGE mediated the renal fibrosis in UUO model mice via upregulation of autophagy
Source: PubMed Central journal article supplement (PMC9035155; doi:10.1038/s41419-022-04856-z), 2022-04-23
Supplement: 41419_2022_4856_MOESM3_ESM.pdf [file 41419_2022_4856_MOESM3_ESM.pdf]

# Manuscript

*by* Similarity Checker

---

**Submission date:** 30-Mar-2022 12:00AM (UTC-0700)

**Submission ID:** 1791866806

**File name:** Proximal\_Tubular\_RAGE\_mediated.docx (105.78K)

**Word count:** 3192

**Character count:** 18741

---

1 **Proximal Tubular RAGE mediated the kidney fibrosis in UUO model mice via**  
2 **up regulation of autophagy**

3  
4  
5 **Abstract**

6 Previous studies reported that RAGE participated in the process of kidney fibrosis, but the function and  
7 regulation pathway of RAGE in proximal tubular cells in this process remains unclear. Here, we found  
8 that expression of RAGE was increased by TGF- $\beta$ 1 treatment and unilateral ureteral obstruction  
9 (UUO). Knock down of RAGE ameliorated renal fibrosis by TGF- $\beta$ 1 treatment, the expression of  
10 vimentin, Collagen I&III, and fibronectin are decreased. Mechanistically, RAGE mediated  
11 TGF- $\beta$ 1-induced phosphorylation of Stat3 and directly upregulated the Atg7 to increase the level  
12 of autophagy, and ultimately resulting in renal fibrosis. Furthermore, PT-RAGE-KO mice reduced  
13 kidney fibrosis in UUO model via inhibiting Stat3/Atg7 axis by knocking down RAGE.  
14 Furthermore, the above findings were confirmed in kidney of patients with obstructive  
15 nephropathy. Collectively, RAGE in proximal tubular cells promotes the autophagy to increase  
16 renal fibrosis via upregulation of Stat3/Atg7 axis.

17 **Introduction**

18 Chronic kidney disease (CKD) has a high prevalence rate<sup>1,2</sup>, which seriously affects human  
19 health. It is estimated that CKD existed in about more than 10% of adults in developed countries<sup>1</sup>.  
20 Kidney fibrosis is a major pathological feature of CKD. The existing treatments for renal fibrosis  
21 are only slightly effective or ineffective<sup>3</sup>. Emerging data suggests that the tubular epithelium  
22 regulates renal fibrosis<sup>2,4</sup>. But mechanisms of tubular epithelium in renal fibrosis are still poorly  
23 understood.

24 Receptor for advanced glycation end products (RAGE) regulates the innate immune response  
25 via binding of numerous exogenous and endogenous ligands<sup>5</sup>. Recent studies report that it not  
26 only plays a pivotal role in early tissue repair in disease<sup>6</sup>, but also is increased in the procession of  
27 occurrence and development of a variety diseases including cancer, diabetes, neurodegeneration<sup>7</sup>.

---

19  
28 Advanced glycation end products (AGEs) directly bind to RAGE, and leads to the increasing of  
29 expression level of cytokines and growth factors, including vascular endothelial growth factor and  
30 connective tissue growth factor, finally results in glomerular injury<sup>8-13</sup>. Besides, previous study  
31 reported that global RAGE knockout mice reduced renal interstitial fibrosis via downregulation of  
32 transforming growth factor (TGF)- $\beta$ <sup>14</sup>. But the function and mechanism of proximal tubular  
33 RAGE in renal fibrosis remain unclear according to available data.

34 Autophagy is a process which cytoplasmic components are degraded by lysosomes<sup>15</sup>. The role  
35 of autophagy is associated with the type of cell or tissue and the experimental model<sup>16</sup>. For  
36 example, UUO-induced kidney fibrosis was exacerbated in PT-ATG5-KO autophagy deficiency  
37 mice or LC3(-/-) mice (deletion of LC3B)<sup>17,18</sup>, this was alleviated in PT-ATG7-KO autophagy  
38 deficiency mice in contrary<sup>17</sup>. The data indicated that roles of autophagy in UUO-kidney fibrosis  
39 remain controversial. In addition, AGEs bind to RAGE and then induces autophagy in various  
40 diseases including heart disease and colorectal cancer<sup>19-22</sup>, which suggested that RAGE partly  
41 mediates autophagy production. But the function and pathway of proximal tubular RAGE in  
42 UUO-induced autophagy are still unclear. According to the above literature, we hypothesize that  
43 proximal tubular RAGE can induce kidney fibrosis by regulating autophagy.

44 In our present study, we observed that RAGE was induced by UUO and TGF- $\beta$ 1, and then  
45 mediated autophagy to increase the renal fibrosis via STAT3/Atg7 axis *in vitro and vivo*. These  
46 results contribute to our understanding of the renoprotection by proximal tubular RAGE deletion  
47 in response to UUO.

48

## 49 **Methods**

### 50 **Antibodies and reagents.**

51 Anti- $\beta$ -Tubulin (ab175186), anti-RAGE (ab216329), anti-fibronectin (ab2413), anti-Collagen I  
52 (ab138492), anti-Collagen III (ab184993), anti-vimentin (ab92547), and anti- $\alpha$ -SMA (ab124964)  
53 antibodies were purchased from Abcam (Cambridge, UK). Anti-Stat3 (9139), Phospho-Stat3  
54 (4074), Atg7 (2631), and LC3-I/II (4108) were supplied by Cell Signaling Technology (MA,  
55 USA), while anti-p62, SQSTM1 (Cat No.18420-1-AP) were obtained from Proteintech (IL, USA).

---

56 Recombinant human TGF- $\beta$ 1 (7754-BH) was obtained from R&D Systems (MN, USA). The  
57 RAGE siRNA and Atg7 siRNA were supplied by Santa Cruz Biotechnology. Atg7 and GFP-  
58 LC3-I/II plasmid was constructed by the Ruqi company(Guanzhou, China).

#### 59 **Animal experiments**

60 <sup>1</sup> The proximal tubule-specific RAGE or Atg7-deletion mice were produced by crossing RAGE or  
61 Atg7 (flox/flox) mice (obtained from Dr Wang Lab and Dr Xiong Lab, respectively) with  
62 PEPCK-Cre mice. The <sup>1</sup> UUU model was constructed by ligating the left ureter in mice<sup>2</sup>. After  
63 obtaining ethical approval, the animals were experimented in compliance with the guidelines  
64 approved by the Animal Care Ethics Committee of Second Xiangya Hospital, China. The mice  
65 were housed at stable room temperature in a 12/12-h light/dark cycle and accessed to standard  
66 rodent chow and water.

#### 67 **Human samples**

68 <sup>20</sup> The project was approved by the Review Board of Second Xiangya Hospital, China, kidney  
69 biopsy samples were collected from obstructive nephropathy (Ob) patients as Ob group (n = 8)  
70 and normal subjects as control group (n = 8). We announce that all experiments were performed in  
71 compliance with the Declaration of Helsinki principles, and also complied with the guidance of  
72 the Ministry of Science and Technology for the Review and Approval of Human Genetic  
73 Resources. The inclusion criteria of Ob were referred to a previous study<sup>2</sup>.

#### 74 **Cell culture, transfection, and treatment**

75 <sup>13</sup> BUMPT cells were grown in DMEM medium (Thermo-Fisher-Scientific) containing 10% FBS  
76 and antibiotics in a <sup>17</sup> 37 °C incubator with 5% CO<sub>2</sub>. BUMPT cells were transfected with plasmids or  
77 siRNA using lipofection 2000 for twenty-four hours, followed by overnight starvation in a  
78 serum-free medium. Subsequently, the cells were treated with/without 5 ng/ml TGF- $\beta$ 1 for another  
79 24 h. Bovine serum albumin (0.1%) was used as control.

#### 80 **Histological, immunohistochemical, immunofluorescence, and Western blot analyses.**

81 <sup>21</sup> Renal tissues were collected and stained with HE and Masson's trichrome as previous described<sup>2</sup>.  
82 Immunohistochemical analysis was carried out using anti-RAGE (1:50), <sup>15</sup>  $\alpha$ -SMA (1:100), Collagen

---

83 I/III (1:100) and fibronectin (1:100) in accordance with the previous instruction<sup>2</sup>. The  
84 immunofluorescence of puncta was performed following the standard process. Whole BUMPT  
85 cell or kidney tissue protein lysates were separated through SDS-PAGE, and then transferred to  
86 membrane and subsequently exposed to primary antibodies of RAGE, STAT3, p-STAT3,  $\alpha$ -SMA,  
87 Collagen I/III, fibronectin, vimentin, and Atg7 following by the second antibody according to the  
88 standard procedure.

#### 89 Establishment of PT-RAGE-KO mice

90 To explore the role of proximal tubular RAGE in renal fibrosis, we constructed a proximal tubules  
91 of RAGE-KO mouse model. The breeding instruction is denoted in FigS4 A, floxed RAGE alleles  
92 in male mice ( $RAGE^{fl/XY}$ ) were crossed with female phosphoenolpyruvate carboxy  
93 kinase-cAMP-response element (PEPCK-Cre) transgenic mice ( $RAGE^{+/+}X^{cre}X^{cre}$ ). After the  
94 first-generation born, heterozygous female offsprings ( $RAGE^{fl/+}X^{cre}X$ ) were crossed with  
95  $RAGE^{fl/+}X^{cre}Y$  male mice to generate the proximal tubule RAGE wild-type (PT-RAGE-WT) and  
96 PT-RAGE-KO ( $RAGE^{fl/fl}X^{cre}Y$ ) littermate mice. To identify genotypes, each mouse was subjected  
97 to three sets of PCR. PT-RAGE-KO mice has three genotypic features: (i) the 224-bp DNA  
98 fragment floxed allele is amplified; (ii) the 304-bp DNA fragment WT allele is insufficiently  
99 amplified; (iii) the 370-bp DNA fragment in Cre gene is amplified (FigS4 B). Western blot  
100 analysis revealed that the RAGE expression level in the renal cortices of PT-RAGE-KO mice was  
101 decreased compared to PT-RAGE-WT under sham and UUO injury treatment (see FigS4 C&D),  
102 this was further confirmed by the immunohistochemistry result (see FigS4 E). The data indicated  
103 that tubular RAGE was knockdown in this conditional KO model.

104

#### 105 ChIP assay

106 Chromatin immunoprecipitation (ChIP) assay was performed using commercial kit (Millipore,  
107 MA, USA) with primary antibodies against STAT3<sup>23</sup>. The following primer pairs were employed  
108 to analyze the precipitated DNA through RT-qPCR: SBS1: 5'-CTGGCGGGGTTCA CTTAGGA-3'  
109 and 5'-TCACAGTCCGGGGACACAAG-3'; SBS2: 5'-CCGAATCAACCTGCG TCTGC-3', and  
110 5'-CGGCCTCTGCTTCACTGAGT-3'; SBS3: 5'-TGTTGTTGTAGTGCGC ATGC-3', and

---

111 5'-GGGGACCGAGTATAGACAGGT-3'; SBS4:5'-GGCCACGGAGTAAGCTTGT G-3', and  
112 5'-TGTGTCCGATTGCCTAGGCT-3'.

113

#### 114 **Statistics.**

115 Quantitative data were described as mean ± standard deviation. Student's t test was employed for  
116 comparing two groups, whereas one-way ANOVA was employed for comparing multiple groups.

117 Level of statistical significance was set at P<0.05.

118

119

### **Results**

#### 120 **Expression of RAGE is upregulated by TGF-β1 in BUMPT cells, UO in mice, and in the** 121 **renal cortices of Ob-patients.**

122 At the outset, the expression of RAGE in obstructive nephropathy (Ob) patients was  
123 upregulated significantly compared to the control group (Fig. 1C&F). Next, this finding was also  
124 confirmed in BUMPTs treated with/without TGF-β1 (Fig. 1A&D), which was the same as the  
125 results observed in the kidney tissues of UO or sham mice (Fig. 1B&E). Moreover, the  
126 immunohistochemistry staining of RAGE verified our above results (Fig. 1G). RAGE expression  
127 was induced by TGF-β1 in BUMPTs, UO in mice, and in the renal cortices of Ob-patients.

128

#### 129 **RAGE mediates the TGF-β1-stimulated expression of fibronectin, vimentin and Collagen** 130 **I&III in BUMPTs.**

131 To determine the role of RAGE in renal fibrosis, BUMPTs were first transfected with RAGE  
132 siRNA or RAGE plasmid, and then administered with/without TGF-β1. The immunoblot results  
133 showed that TGF-β1-stimulated the enhancement of expression levels of fibronectin (FN),  
134 Collagen I&III, vimentin, and RAGE was attenuated by RAGE siRNA (see Fig. 2A-F), by the  
135 contrast, these changes were improved by the overexpression of RAGE plasmids (see Fig. 2G-  
136 L). The data demonstrated that RAGE at least partly mediated TGF-β1-stimulated the expression

---

137 of fibronectin, vimentin and Collagen I&III.

138

139 **RAGE mediated the TGF- $\beta$ 1-induced autophagy in BUMPTs.**

140 Previous research has demonstrated that RAGE mediated AGEs induced autophagy, but the role  
141 of RAGE in TGF- $\beta$ 1-triggered autophagy remains unclear. The immunoblot analysis  
142 demonstrated that TGF- $\beta$ 1-stimulated the **upregulation** of RAGE and LC3 II, and the reduction of  
143 p62 was markedly ameliorated by RAGE siRNA (see Fig. 3A&C), **well**, this was augmented by  
144 RAGE plasmids (see Fig. 3B&D). To observed autophagosome formation, GFP-LC3 was used to  
145 transfect HK-2 cells, which given a granular, punctate stain in the cytoplasm. As shown in Fig.  
146 3E&F, the LC3 puncta numbers and intensity both improved after the treatment of TGF- $\beta$ 1, which  
147 was reduced by RAGE siRNA but augmented by RAGE plasmids. This finding was consistent  
148 with the immunoblot results. The data showed that RAGE mediated TGF- $\beta$ 1 induced autophagy.

149

150 **The RAGE mediated the TGF- $\beta$ 1-induced autophagy in BUMPT cells via STAT3/Atg7 axis**

151 The above finding revealed that RAGE promoted the renal fibrosis, however, the regulation  
152 mechanism remains largely unknown. In current study, the immunoblotting results showed that  
153 TGF- $\beta$ 1-stimulated **enhancement** of p-Stat3, Atg7, and LC3 II, and the reduction of p62 was  
154 notably attenuated by STAT3-IN-1, an STAT3 inhibitor (see Fig. 4A&B). Furthermore, we  
155 observed that the administration of STAT3-IN-1 reduced the mean number of LC3 puncta in each  
156 cell vs TGF- $\beta$ 1 group (see Fig. 4C&D). Then, we investigated whether STAT3 is responsible for  
157 the upregulation of Atg7 during TGF- $\beta$ 1-induced autophagy in **BUMPT** cells. The predication  
158 result of **JASPAR CORE** database (<http://jaspar.genereg.net/>) indicated that Atg7 promotor  
159 sequence contain four binding sites of STAT3. ChIP assays showed a binding sites (a 227-bp  
160 fragment) for STAT3 in the in promoter region of Atg7 (see Fig. 4E). Finally, the immunoblotting  
161 results showed that TGF- $\beta$ 1-induced the Stat3/Atg7 signal pathway was attenuated by the RAGE  
162 siRNA (see Fig. 4F&H), **oppositely**, this was notably enhanced by the RAGE plasmid (see Fig.  
163 4F&H). Collectively, the data revealed that RAGE/STAT3/Atg7 axis could mediate  
164 TGF- $\beta$ 1-triggered autophagy in BUMPT cells.

165

166 **Atg7 mediates TGF- $\beta$ 1-stimulated expression of fibronectin, vimentin and Collagen I&III in**  
167 **BUMPT cells.**

168 The association between autophagy and renal fibrosis remains controversy<sup>24</sup>. UUO-induced  
169 kidney fibrosis was exacerbated in PT-ATG5-KO autophagy deficiency mice or LC3(-/-)  
170 mice(deletion of LC3B)<sup>17,18</sup>, in contrary, this was ameliorated in PT-ATG7-KO autophagy  
171 deficiency mice<sup>17</sup> Here, we focused on the Atg7, **a core autophagy-related protein**. BUMPT  
172 cells transfected with Atg7 siRNA or Atg7 plasmid were treated with TGF-B1 as well as control  
173 vehicle. As displayed in Fig. 4A&B, TGF- $\beta$ 1-stimulated the increasing of Atg7, LC3 II,  
174 fibronectin, Collagen I&III, and vimentin as well as the reduction of p62 was markedly suppressed  
175 by the Atg7 siRNA (see Fig.5A&B), by the contrast, this was reinforced by the Atg7 plasmid (see  
176 Fig.5C&D). We further verified that TGF- $\beta$ 1-stimulated the enhancement of the mean number of  
177 LC3 puncta/cell was attenuated by the Atg7 siRNA, however, this was augmented by the Atg7  
178 plasmid (see Fig.5E&F). The data suggest that autophagy is at least partly responsible for the  
179 increasing of fibronectin, vimentin and Collagen I&III induced by the TGF- $\beta$ 1.

180

181 **UUO-induced renal fibrosis was ameliorated in PT-ATG7-KO mice**

182 In order to confirm the role of Atg7 in renal fibrosis, PT-ATG7-KO mice was established, and  
183 then subjected to UUO model for 7 days. The results of HE and Masson staining demonstrated  
184 that UUO-induced tubular damage and renal interstitium fibrosis was ameliorated in  
185 PT-ATG7-KO mice (see Fig. 6A-B). Then, we performed immunochemical staining which  
186 showed that the expression of  $\alpha$ -SMA, Collagen I&III, and fibronectin was upregulated in UUO  
187 model of PT-ATG7-WT mice, whereas it was notably ameliorated in PT-ATG7-KO mice (see Fig.  
188 6C&D). The immunoblotting analysis revealed that UUO-induced the enhancement of Atg7, LC3  
189 II,  $\alpha$ -SMA, Collagen I&III and fibronectin, and the reduction of p62 was markedly decreased in  
190 PT-ATG7-KO mice (see Fig. 7A-H). The data verified that Atg7 plays an essential role in  
191 UUO-induced renal fibrosis.

192



---

193 **UUO-induced kidney fibrosis is alleviated in PT-RAGE-KO mice via inhibition of**  
194 **STAT3/Atg7 axis**

195 The PT-RAGE-KO and PT-RAGE-WT littermate mice were subjected to UUO model for 7 days.  
196 The results of HE and Masson staining demonstrated that UUO-induced tubular damage and renal  
197 interstitium fibrosis was alleviated in PT-RAGE-KO mice (see Fig. 8A-B). The data of  
198 immunochemical staining showed that UUO-induced the expression of  $\alpha$ -SMA, Collagen I&III,  
199 and fibronectin was remarkably decreased in PT-RAGE-KO mice (Fig. 8 C&D). The  
200 immunoblotting analysis demonstrated that UUO-induced induced the increasing of  $\alpha$ -SMA,  
201 Collagen I&III, fibronectin, Atg7, LC3 II as well as the reduction of p62 was markedly reversed in  
202 PT-RAGE-KO mice (Fig. 8 E-H). The data confirmed that Proximal Tubular RAGE mediated the  
203 renal fibrosis in UUO model mice via up regulation of autophagy.

204 **RAGE mediates TGF- $\beta$ 1-induced kidney fibrosis depended on the Atg7 *in vitro and vivo***

205 To further explore whether RAGE promotes the renal fibrosis via autophagy during TGF- $\beta$ 1  
206 treatment, we carried out the following experiments. Firstly, RAGE siRNA significantly  
207 ameliorated the TGF- $\beta$ 1-stimulated the expression of  $\alpha$ -SMA, Collagen I&III, and fibronectin in  
208 BUMPTs, which was markedly reversed by the overexpression of Atg7 (see FigS1, E&F).  
209 Consistently, the results of HE and Masson staining demonstrated that PT-RAGE-KO attenuated  
210 UUO-induced tubular damage and renal interstitium fibrosis, which was attenuated by the  
211 injection of Atg7 plasmid (see FigS1, A&B). The Western blot data showed that PT-RAGE-KO  
212 mice not only suppressed the UUO-induced kidney fibrosis but also the expression of  $\alpha$ -SMA, Col  
213 I&III, and fibronectin, which confirmed the above pathological results (see FigS1, C&D).  
214 Secondly, the data of HE and Masson staining revealed that UUO-induced tubular damage and  
215 renal interstitium fibrosis was alleviated in PT-Atg7-KO mice which was injected with RAGE  
216 Plasmid (see FigS2, A&B). Atg7 siRNA remarkably decreased the TGF- $\beta$ 1-stimulated the  
217 expression of  $\alpha$ -SMA, Collagen I&III, and fibronectin in BUMPTs, this was not reversed by the  
218 overexpression of RAGE (see FigS2, E&F). Consistently, PT-Atg7-KO mice not only reduced the  
219 UUO-induced kidney fibrosis but also the expression of  $\alpha$ -SMA, Col I&III, and fibronectin, this  
220 was also not reversed by the overexpression of RAGE (see FigS2, C&D). The data demonstrated  
221 that RAGE induced the renal fibrosis depended on the autophagy *in vitro and vivo* models.

---

222 **RAGE/Stat3/Atg7 axis mediated renal fibrosis in patients with Ob.**

223 The data of HE and Masson staining showed that patients with Ob-triggered tubular damage and  
224 renal interstitium fibrosis than the patients with MCD (see Fig. S3 A&B). Immunoblot data also  
225 revealed that patients with Ob-induced the expression of  $\alpha$ -SMA, Collagen I&III, and fibronectin,  
226 Atg7, RAGE, LC3II, and p-stat3 as well as the decreasing of p62 than the patients with MCD (see  
227 FigS3 C-F).

228

229

230 **Discussion**

231 Previous studies demonstrated that global RAGE knock out attenuated that renal fibrosis<sup>14,25</sup>.  
232 This study for the first time demonstrated that proximal tubular RAGE also attenuated the kidney  
233 fibrosis induced by TGF- $\beta$ 1 *in vitro* and UUO *in vivo*. Mechanistically, RAGE mediated the  
234 TGF- $\beta$ 1-triggered Stat3 activation and then promoted autophagy to increase renal fibrosis via  
235 upregulation of Atg7. The data suggested that tubular RAGE may be considered as a therapy  
236 target.

237 Several studies have shown that the AGEs-RAGE pathway plays vital roles in the  
238 progression of various kidney disorders including hypertensive nephropathy, diabetic nephropathy,  
239 lupus nephritis, obesity-related glomerulopathy, amyloidosis, ADPKD, and septic AKI<sup>26-33</sup>. The  
240 global knock out or inhibition of RAGE were used to block the AGEs-RAGE pathway in above  
241 studies. Hence, the role of proximal tubular RAGE remains Unclarified. In the current study, we  
242 firstly assessed the increasing of RAGE in the kidneys of Ob patients and UUO mice likewise in  
243 TGF- $\beta$ 1-treated BUMPTs (see Fig. 1). Secondly, we demonstrated that tubular RAGE mediated  
244 the renal fibrosis, which was supported by the following evidences: 1) RAGE siRNA ameliorated  
245 TGF- $\beta$ 1-stimulated the expression of vimentin, collagen I&III, and fibronectin (see Fig.2). 2)  
246 PT-RAGE-KO mice notably ameliorated UUO-induced renal fibrosis (see Fig 9).

247 Previous research has reported that RAGE could regulate the formation of autophagy. For  
248 example, Dr Gao et al reported that RAGE mediated the autophagy via upregulation of pp65-NF

---

249 κ B and BNIP3<sup>19</sup> in pressure overload-induced heart failure. Dr Hou et al found that RAGE  
250 mediated AGEs-induced autophagy in cardiomyocyte injury via PI3K/AKT/mTOR pathway<sup>20</sup>. Dr  
251 Huang et al demonstrated that RAGE promoted the autophagy in colorectal cancer via ERK/Drp1  
252 phosphorylation<sup>21</sup>. Dr Meng et al verified that RAGE promoted the autophagy in  
253 diabetes-associated osteoporosis through Raf/MEK/ERK signaling pathway<sup>22</sup>. In present study, we  
254 **found** that RAGE mediated autophagy, which was demonstrated by the following findings: 1)  
255 TGF-β1-triggered autophagy was attenuated by the RAGE siRNA, **which** was improved by the  
256 overexpression of RAGE (see Fig.3). 2) PT-RAGE-KO mice notably ameliorated the  
257 UUO-induced autophagy (see Fig. 9). Furthermore, we found that Stat3/Atg7 signal pathway is  
258 responsible for the autophagy production mediated by tubular RAGE during TGF-β1 and UUO  
259 treatment. The following evidences supported the above finding: 1) Inactivation of Stat3 signal  
260 pathway reduced TGF-β1 induced autophagy via downregulation of Atg7 (see Fig4. A-D). 2) ChIP  
261 analysis for the first time indicated that Stat3 directly binds the promoter of Atg7(see Fig4. E). 3)  
262 The Stat3/Atg7 signal pathway was suppressed by the RAGE siRNA or PT-RAGE-KO (see Fig4.  
263 F-I and Fig.9. E-I), by the contrast, this was improved by RAGE **overexpression**. In addition, this  
264 signal pathway was also **upregulated** expressed in OB patients (see Fig.S3). Together, these results  
265 support that RAGE/Stat3/Atg7 axis mediated TGF-β1 and UUO-induced autophagy.

266 The roles of autophagy in renal fibrosis still need to be clarified. The research from two  
267 groups reported that PT-ATG5-KO autophagy deficiency or global knock out of LC3B  
268 exacerbated UUO-induced renal fibrosis<sup>17,18</sup>. However, Dr Dong et al found that PT-ATG7-KO  
269 autophagy deficiency mice **attenuated** UUO-induced renal fibrosis<sup>17</sup>. In this study, we found that  
270 PT-ATG7-KO autophagy deficiency mice notably reduced the renal fibrosis **in UUO model** (see  
271 Fig.6&7). In addition, TGF-β1-stimulated the **expression of vimentin, collagen I&III, and**  
272 **fibronectin** was notably reduced by the Atg7 knockdown, by contrast, this was augmented by the  
273 **overexpression of Atg7** (see Fig.5). Our **results** are consistent with the Dr Dong's finding. Finally,  
274 we found that overexpression of Atg7 diminished the protective role of RAGE siRNA or  
275 PT-RAGE-KO on kidney fibrosis induced by TGF-β1 or UUO (see FigS1), however, the  
276 protective role of Atg7 siRNA or PT-ATG7-KO on kidney fibrosis induced by TGF-β1 or UUO  
277 was not enhanced by the overexpression of RAGE. The data suggested that RAGE promoted

---

278 autophagy to exacerbate renal fibrosis during TGF- $\beta$ 1 or UUO treatment.

279 In conclusion, we found that proximal tubular RAGE-mediated renal fibrosis *in vitro and*  
280 *in vivo*. Mechanistically, TGF- $\beta$ 1 stimulated the RAGE and then activated STAT3 to increase  
281 autophagy via directly upregulation of Atg7, and then promoted the progression of renal fibrosis.  
282 Our study suggests that the RAGE/STAT3/Atg7 axis can serve as a therapeutic target of kidney  
283 fibrosis.

284

# Manuscript

## ORIGINALITY REPORT

14%

SIMILARITY INDEX

9%

INTERNET SOURCES

13%

PUBLICATIONS

1%

STUDENT PAPERS

## PRIMARY SOURCES

|   |                                                                                                                                                                     |    |
|---|---------------------------------------------------------------------------------------------------------------------------------------------------------------------|----|
| 1 | <a href="http://www.ncbi.nlm.nih.gov">www.ncbi.nlm.nih.gov</a><br>Internet Source                                                                                   | 2% |
| 2 | Kai Ai, Lei Yi, Yinhuai Wang. "CircRNA_33702 promotes renal fibrosis by targeting the miR-29b-3p/WISP1 pathway", Cold Spring Harbor Laboratory, 2022<br>Publication | 2% |
| 3 | Xiaozhou Li, Jian Pan, Huiling Li, Guangdi Li et al. "DsbA-L mediated renal tubulointerstitial fibrosis in UUO mice", Nature Communications, 2020<br>Publication    | 2% |
| 4 | <a href="http://www.asn-online.org">www.asn-online.org</a><br>Internet Source                                                                                       | 1% |
| 5 | "Renal Fibrosis: Mechanisms and Therapies", Springer Science and Business Media LLC, 2019<br>Publication                                                            | 1% |
| 6 | Kai Ai, Jian Pan, Pan Zhang, Huiling Li et al. "Methyl-CpG-binding domain protein 2 contributes to renal fibrosis through                                           | 1% |

promoting polarized M1 macrophages", Cell Death & Disease, 2022

Publication

---

7 Dongshan Zhang, Yu Liu, Qingqing Wei, Yuqing Huo, Kebin Liu, Fuyou Liu, Zheng Dong. "Tubular p53 Regulates Multiple Genes to Mediate AKI", Journal of the American Society of Nephrology, 2014 1 %

Publication

---

8 [www.nature.com](http://www.nature.com) 1 %

Internet Source

---

9 Man J. Livingston, Han-Fei Ding, Shuang Huang, Joseph A. Hill, Xiao-Ming Yin, Zheng Dong. "Persistent activation of autophagy in kidney tubular cells promotes renal interstitial fibrosis during unilateral ureteral obstruction", Autophagy, 2016 1 %

Publication

---

10 Xuan Xu, Jian Pan, Huiling Li, Xiaozhou Li, Fang Fang, Dengke Wu, Yu Zhou, Peiling Zheng, Li Xiong, Dongshan Zhang. "Atg7 mediates renal tubular cell apoptosis in vancomycin nephrotoxicity through activation of PKC -  $\delta$ ", The FASEB Journal, 2018 1 %

Publication

---

11 [cyberleninka.org](http://cyberleninka.org) <1 %

Internet Source

---

|    |                                                                                                                                                                                                           |      |
|----|-----------------------------------------------------------------------------------------------------------------------------------------------------------------------------------------------------------|------|
| 12 | <a href="http://thno.org">thno.org</a><br>Internet Source                                                                                                                                                 | <1 % |
| 13 | <a href="http://www.aging-us.com">www.aging-us.com</a><br>Internet Source                                                                                                                                 | <1 % |
| 14 | <a href="http://www.jove.com">www.jove.com</a><br>Internet Source                                                                                                                                         | <1 % |
| 15 | Jie Duan, Xishi Liu, Honglin Wang, Sun-Wei Guo. "The M2a macrophage subset may be critically involved in the fibrogenesis of endometriosis in mice", Reproductive BioMedicine Online, 2018<br>Publication | <1 % |
| 16 | <a href="http://Www.semanticscholar.org">Www.semanticscholar.org</a><br>Internet Source                                                                                                                   | <1 % |
| 17 | <a href="http://www.freepatentsonline.com">www.freepatentsonline.com</a><br>Internet Source                                                                                                               | <1 % |
| 18 | <a href="http://afritradomedic.com">afritradomedic.com</a><br>Internet Source                                                                                                                             | <1 % |
| 19 | <a href="http://www.science.gov">www.science.gov</a><br>Internet Source                                                                                                                                   | <1 % |
| 20 | <a href="http://www.spandidos-publications.com">www.spandidos-publications.com</a><br>Internet Source                                                                                                     | <1 % |
| 21 | Chang Chen, Jingya Gu, Jue Wang, Yu Wu, Aihua Yang, Tingting Chen, Tingting Zhou, Zhaoguo Liu. "Physcion 8-O-β-                                                                                           | <1 % |

glucopyranoside ameliorates liver fibrosis through inflammation inhibition by regulating SIRT3-mediated NF- $\kappa$ B P65 nuclear expression", International Immunopharmacology, 2021

Publication

22

Yong-Heng Luo, Ping-Bo Ouyang, Jiao Tian, Xiao-Jian Guo, Xuan-Chu Duan. "Rosiglitazone Inhibits TGF- $\beta$  1 Induced Activation of Human Tenon Fibroblasts via p38 Signal Pathway", PLoS ONE, 2014

Publication

<1 %

23

Jiang, Man, Qingqing Wei, Guie Dong, Masaaki Komatsu, Yunchao Su, and Zheng Dong. "Autophagy in proximal tubules protects against acute kidney injury", Kidney International, 2012.

Publication

<1 %

24

Li-Juan Liu, Feng-Juan Yao, Gui-Hua Lu, Cheng-Gui Xu, Zhe Xu, Kai Tang, Yun-Jiu Cheng, Xiu-Ren Gao, Su-Hua Wu. "The Role of the Rho/ROCK Pathway in Ang II and TGF- $\beta$ 1-Induced Atrial Remodeling", PLOS ONE, 2016

Publication

<1 %

Exclude quotes Off

Exclude matches Off

Exclude bibliography Off
