# Supplementary material for: Proximal tubular RAGE mediated the renal fibrosis in UUO model mice via upregulation of autophagy
Source: PubMed Central journal article supplement (PMC9035155; doi:10.1038/s41419-022-04856-z), 2022-04-23
Supplement: 41419_2022_4856_MOESM4_ESM.pdf [file 41419_2022_4856_MOESM4_ESM.pdf]

Figure 1

RAGE

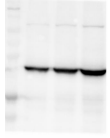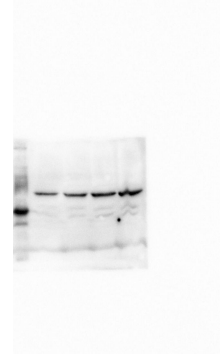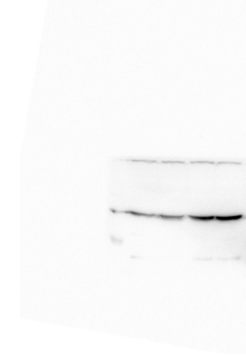

$\beta$ -Tubulin

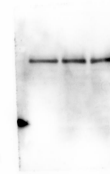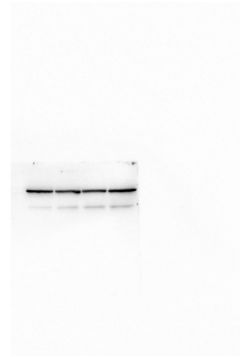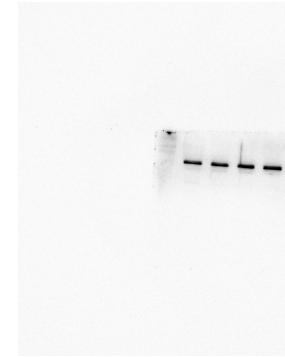

Figure 1

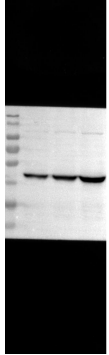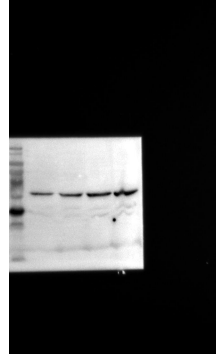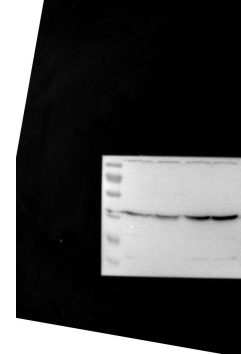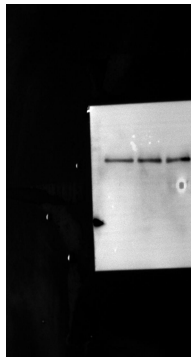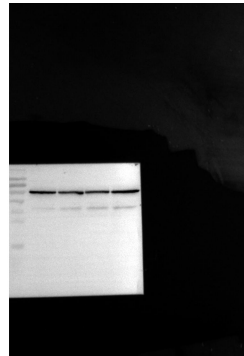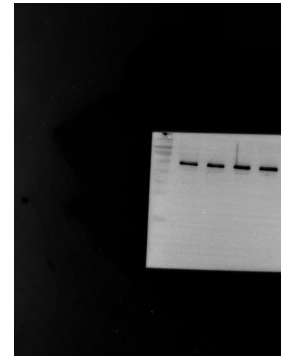

Figure 2

FN

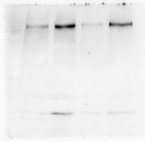

RAGE

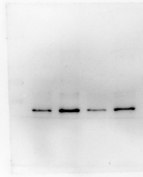

FN

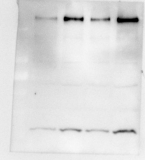

RAGE

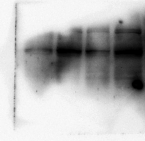

Col I

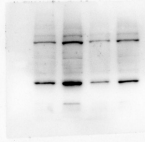

$\beta$ -Tubulin

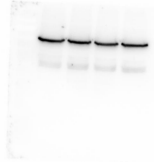

Col I

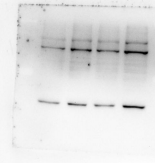

$\beta$ -Tubulin

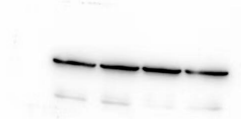

Col III

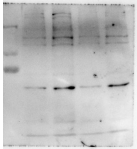

Col III

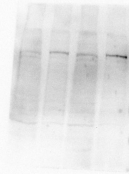

Vimentin

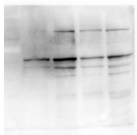

Vimentin

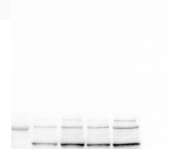

Figure2

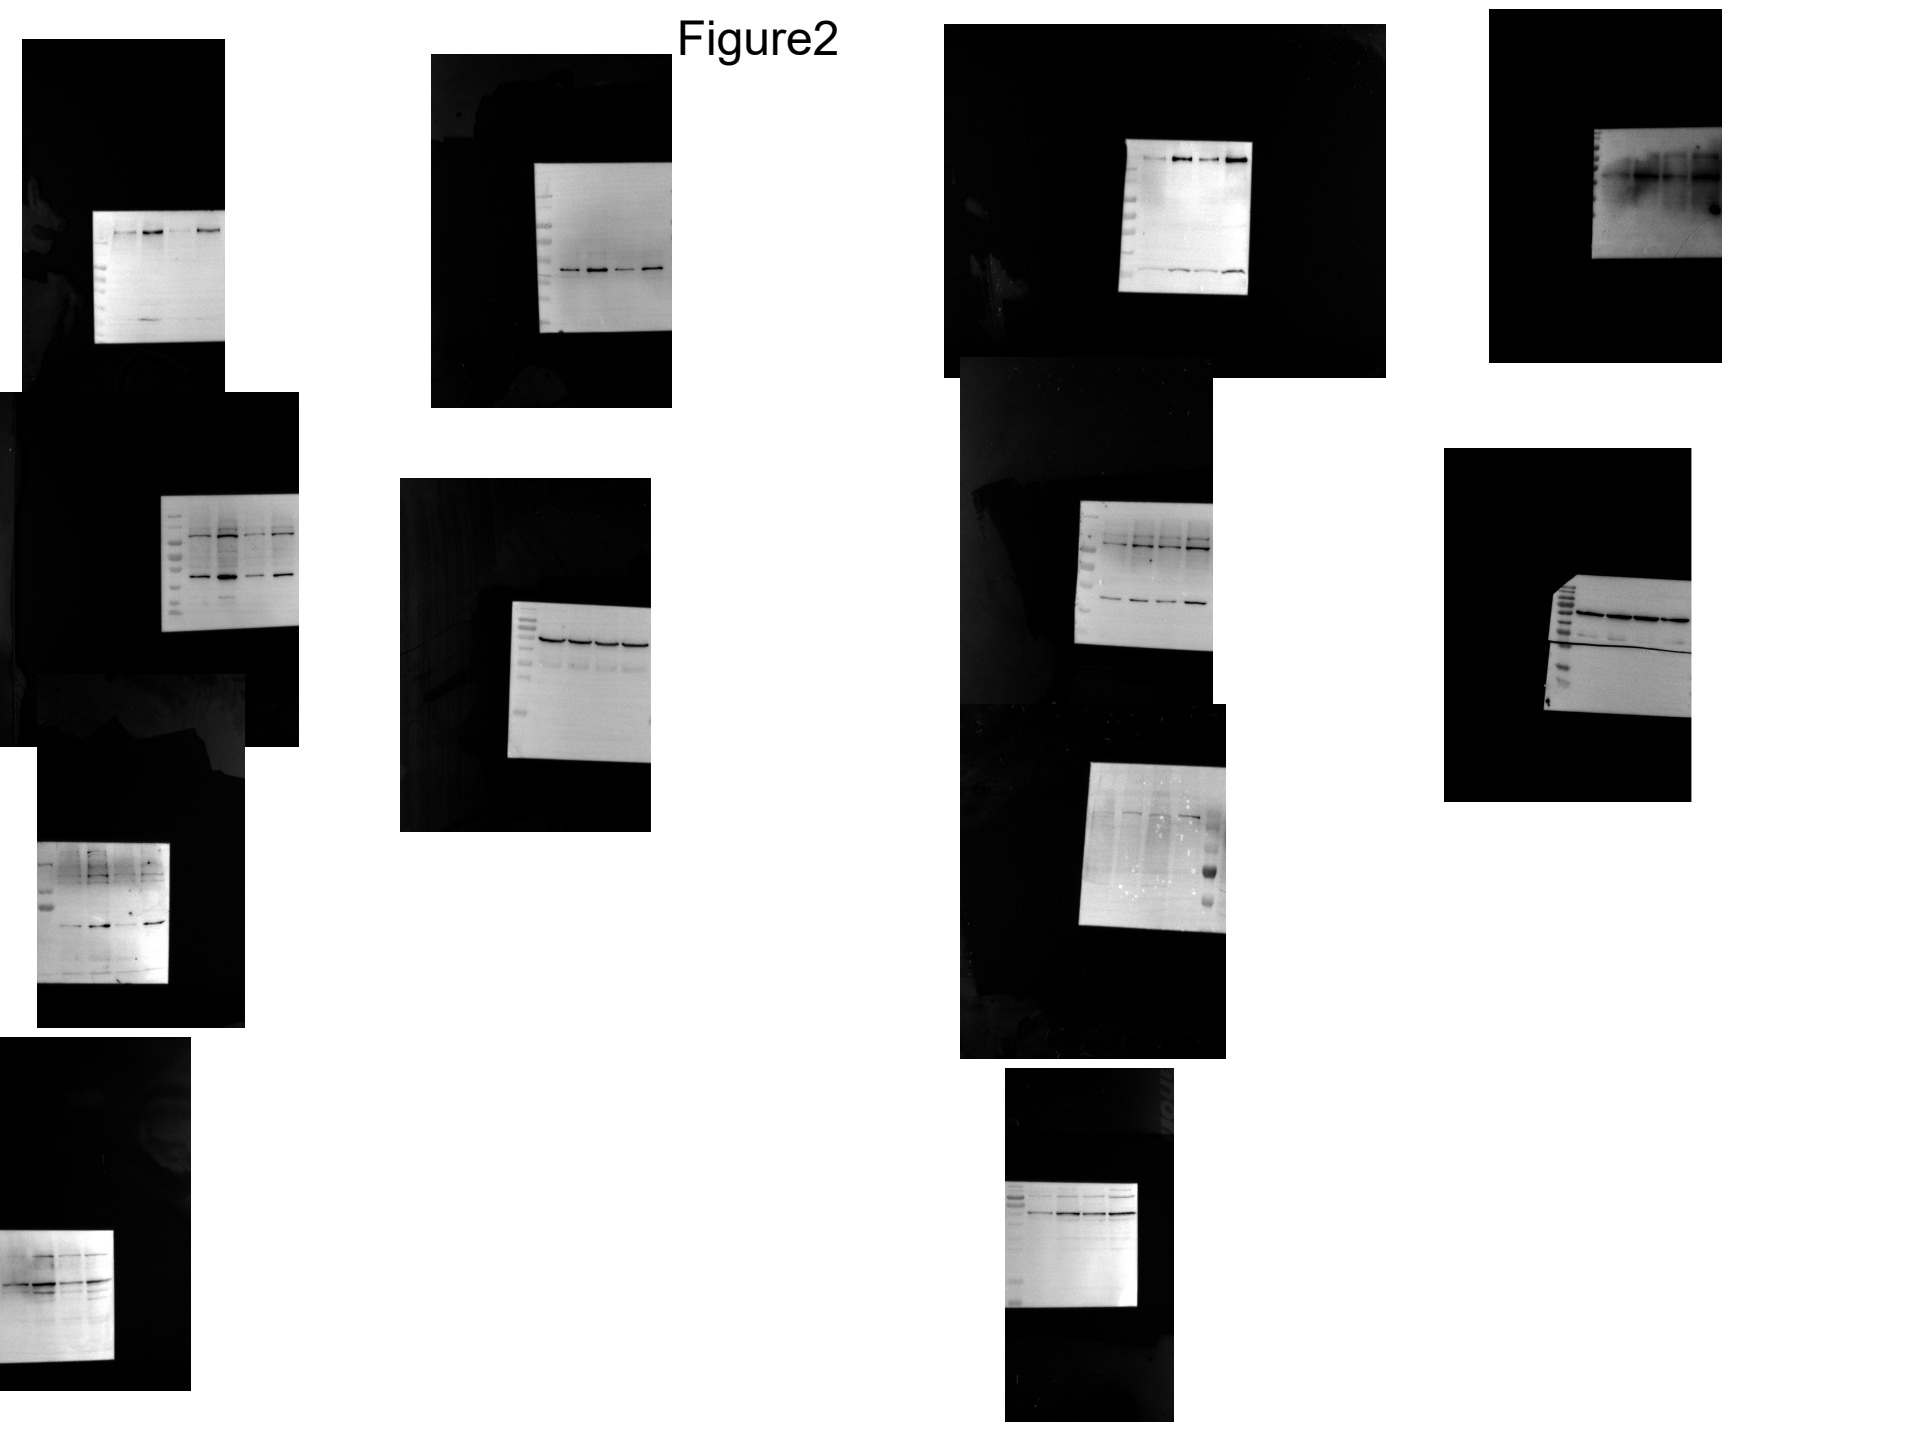

Figure3

LC3

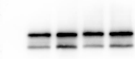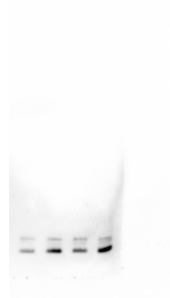

p62

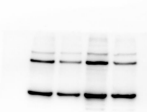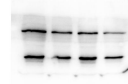

RAGE

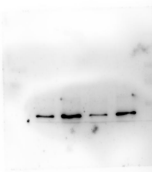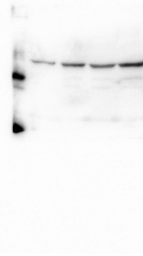

$\beta$ -Tubulin

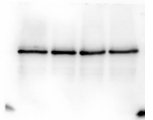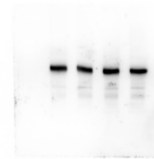

Figure3

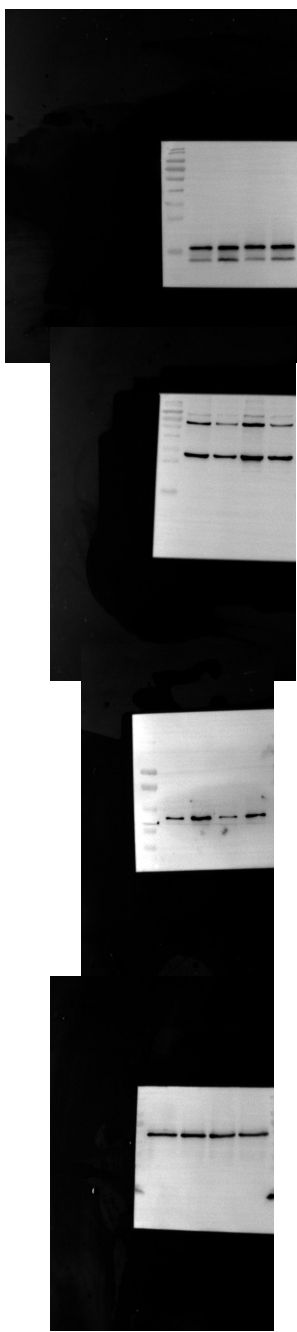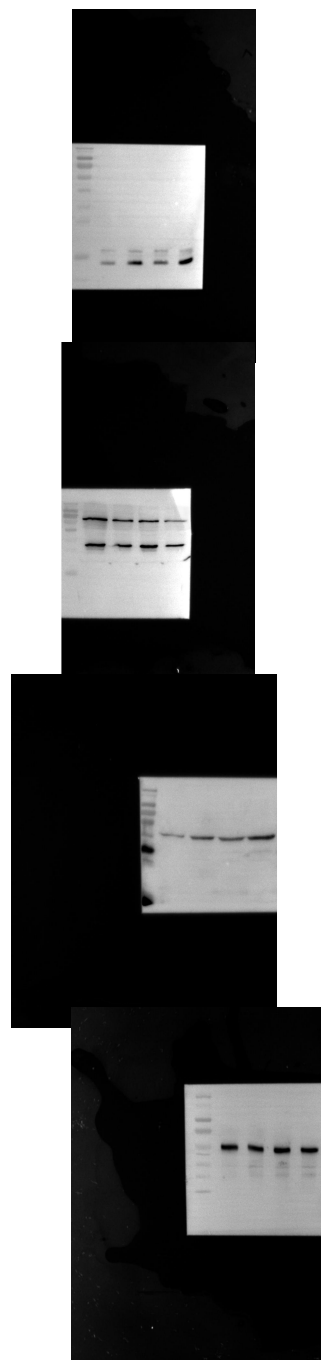

Figure4

LC3

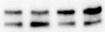

p62

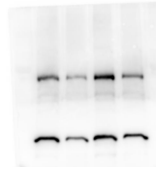

Atg7

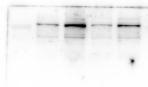

p-Stat3

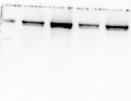

Stat3

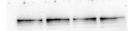

$\beta$ -Tubulin

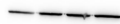

Stat3

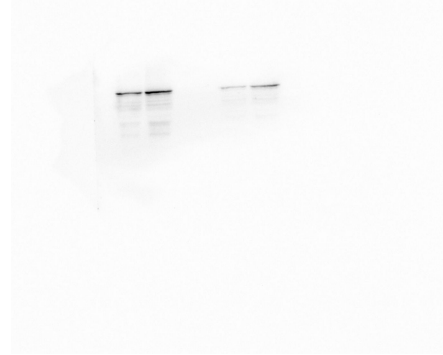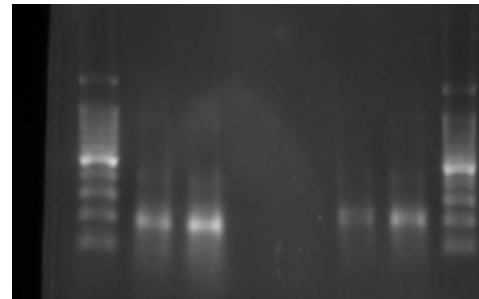

Figure4

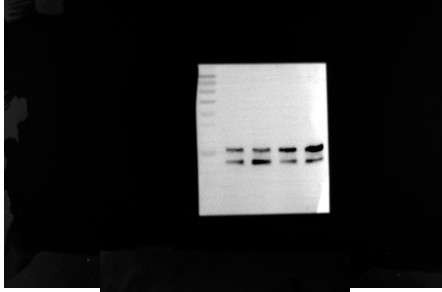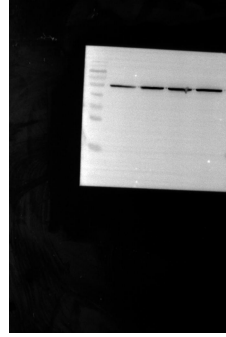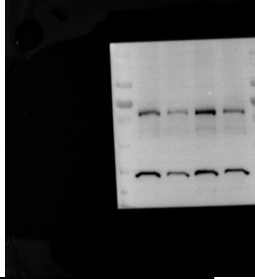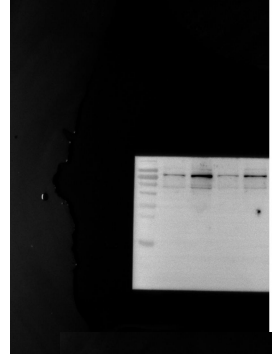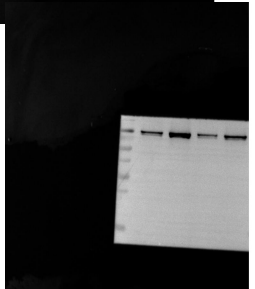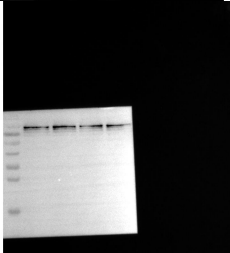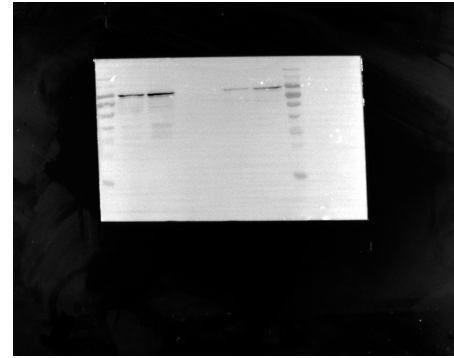



Figure5

Atg7

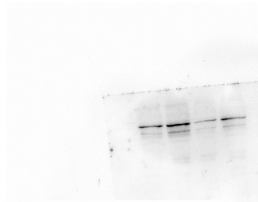

p-Stat3

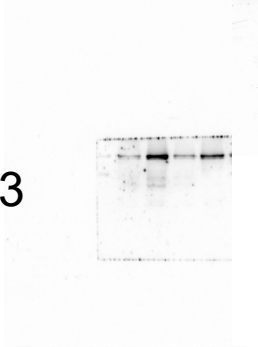

Stat3

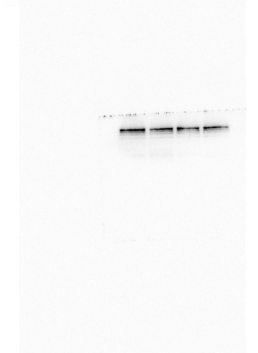

$\beta$ -Tubulin

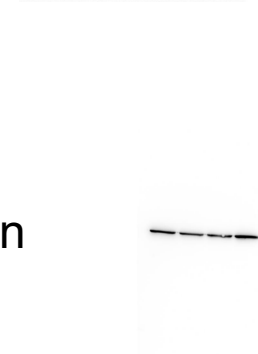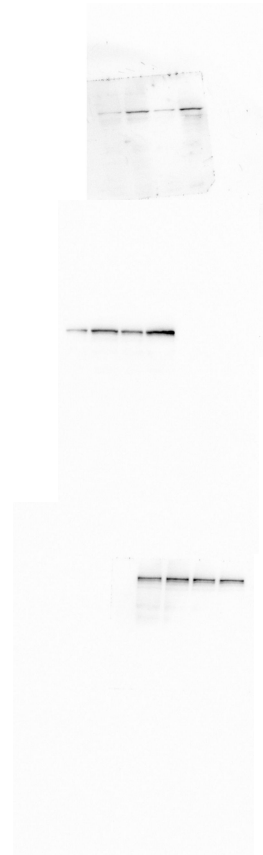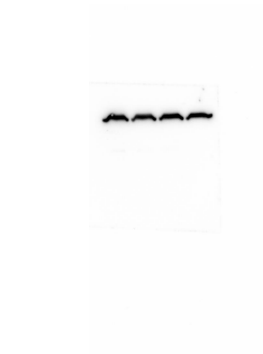

Figure 5

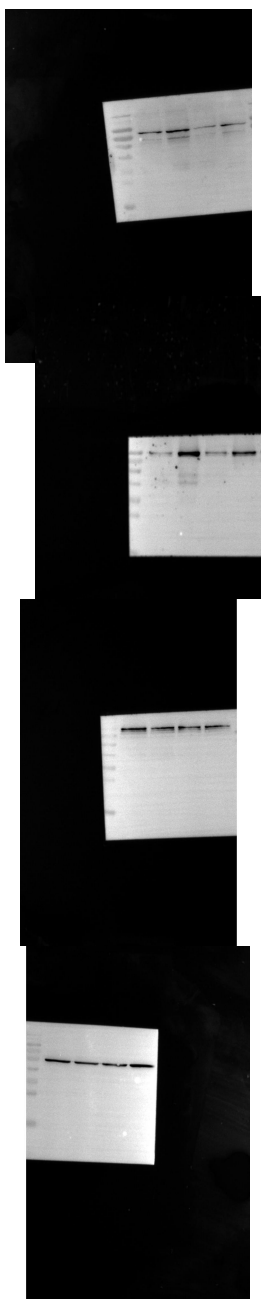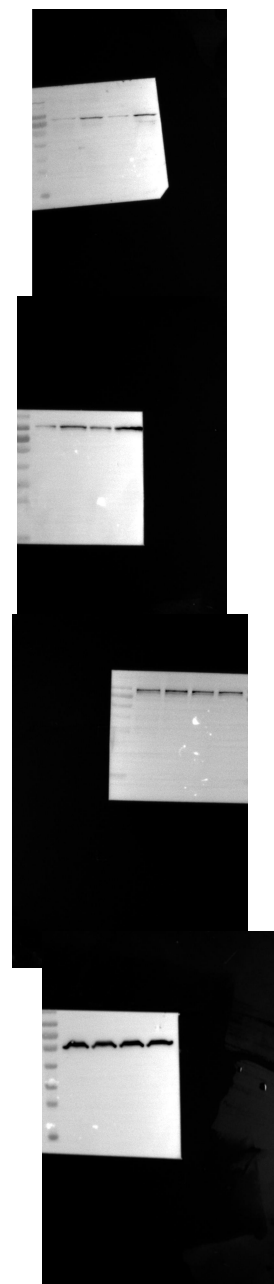

Figure6

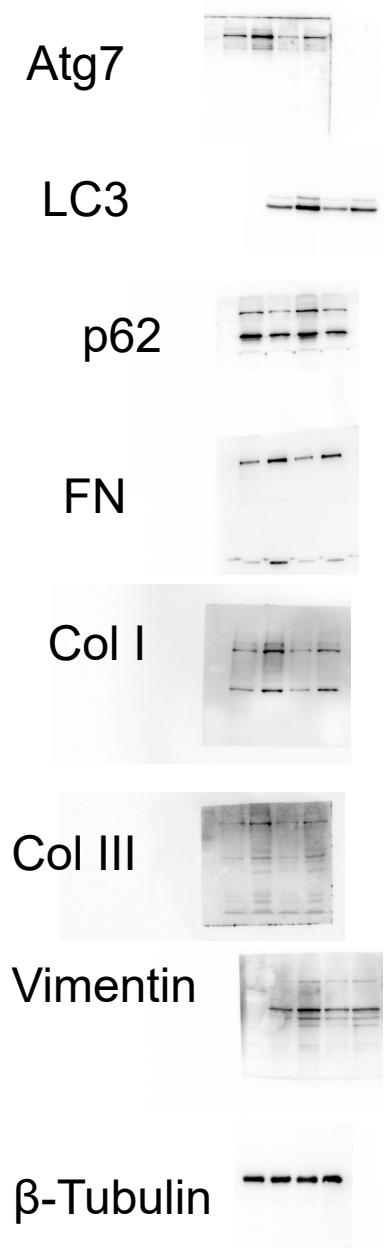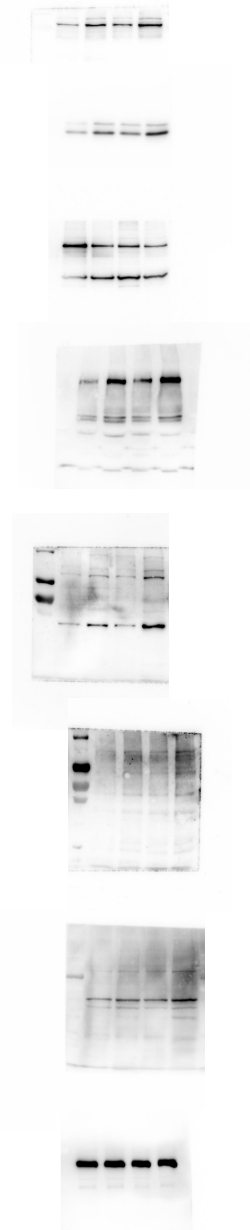

Figure6

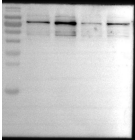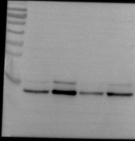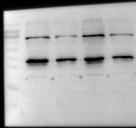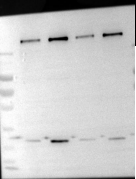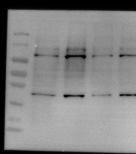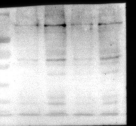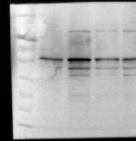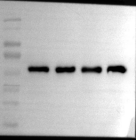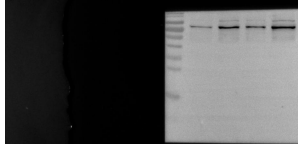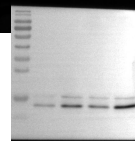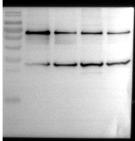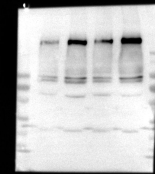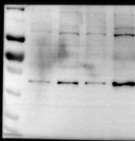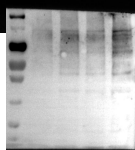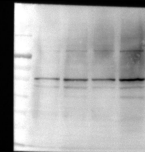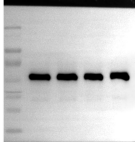

Figure7

Atg7

LC3

p62

FN

Col I

Col III

$\alpha$ -SMA

$\beta$ -Tubulin

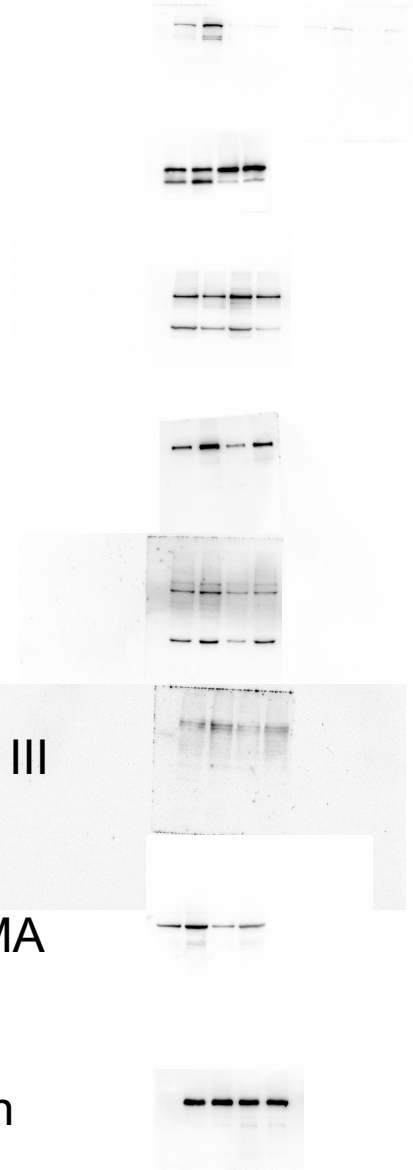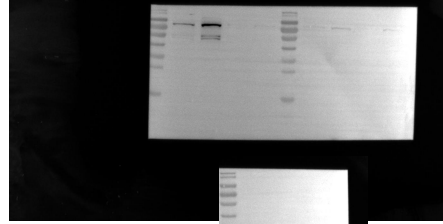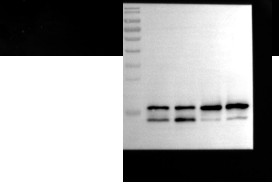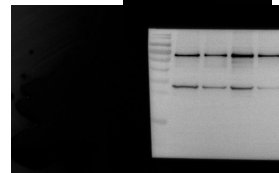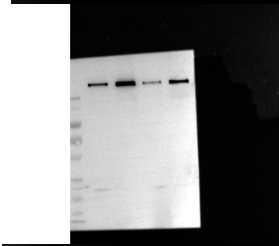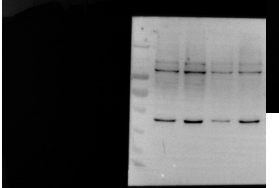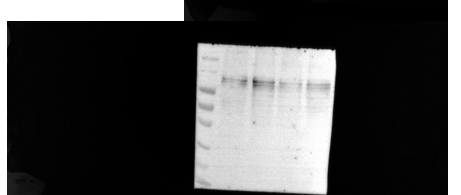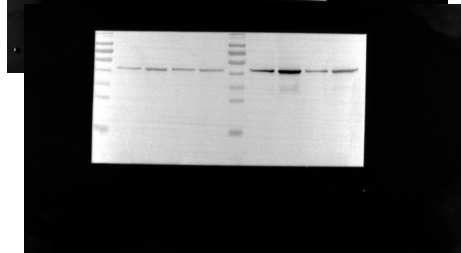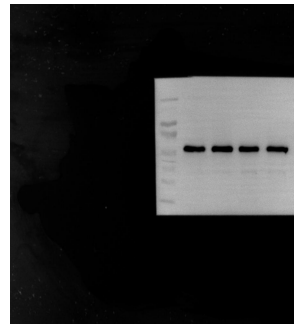

Figure8

RAGE

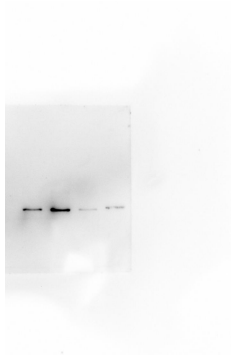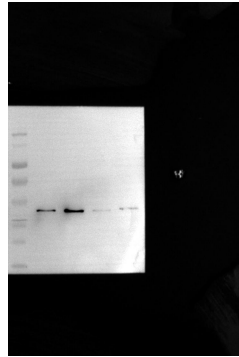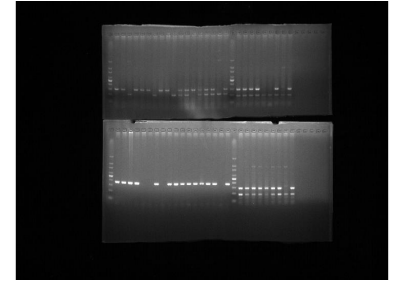

$\beta$ -Tubulin

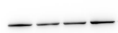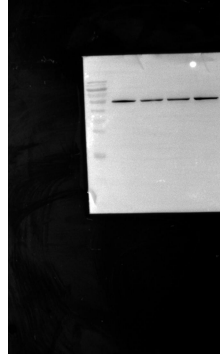

Figure9

FN

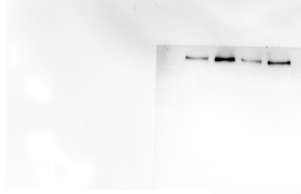

Col I

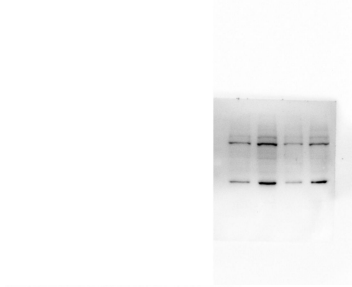

Col III

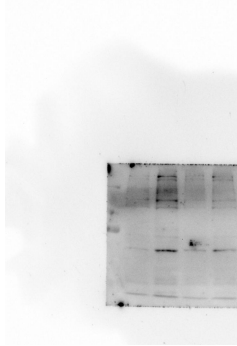

$\alpha$ -SMA

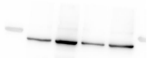

$\beta$ -Tubulin

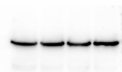

LC3

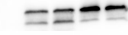

p62

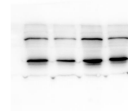

Atg7

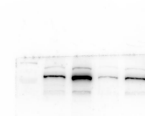

p-Stat3

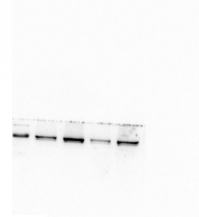

Stat3

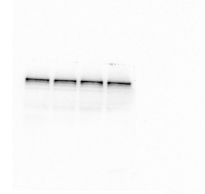

$\beta$ -Tubulin

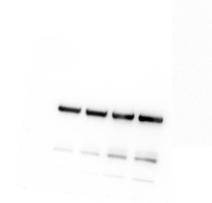

Figure9

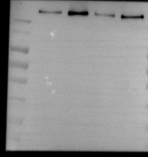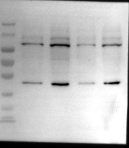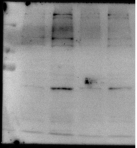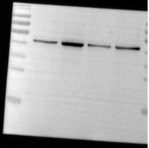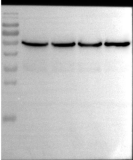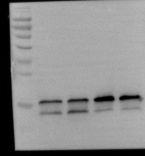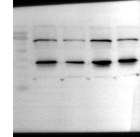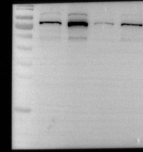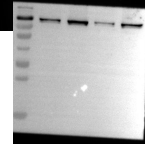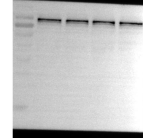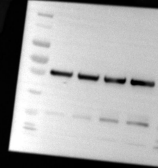



Supplementary Figure1

RAGE

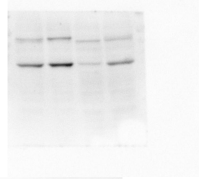

Atg7

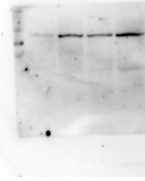

FN

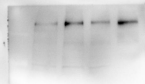

Col I

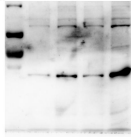

Col III

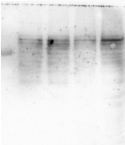

Vimentin

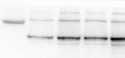

$\beta$ -Tubulin

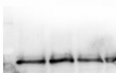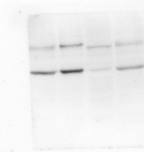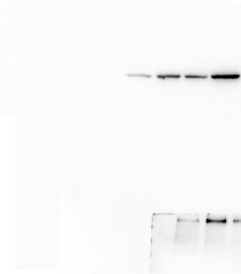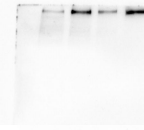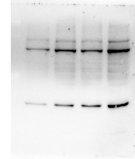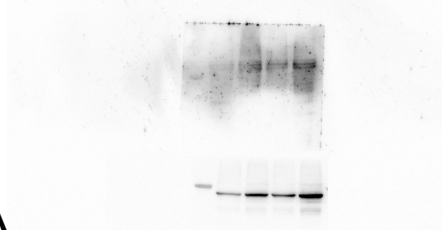

$\alpha$ -SMA

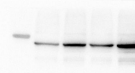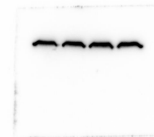

# Supplementary Figure 1

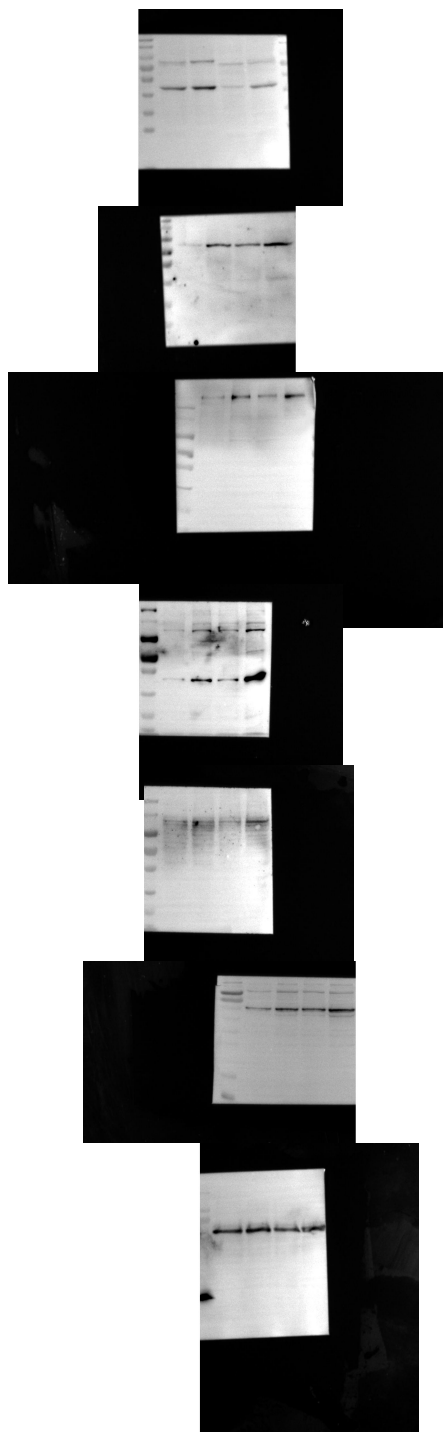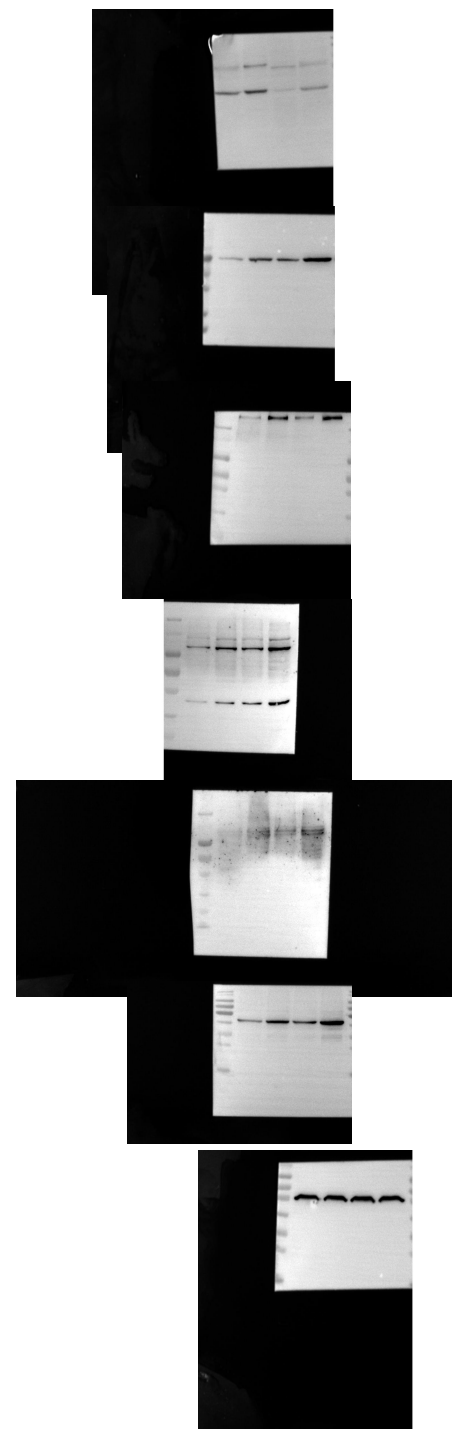

Supplementary Figure2

RAGE

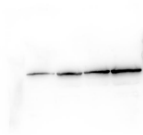

Atg7

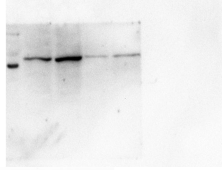

FN

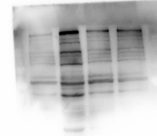

Col I

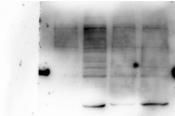

Col III

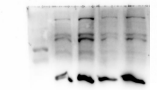

Vimentin

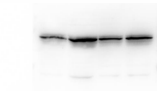

$\beta$ -Tubulin

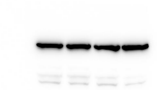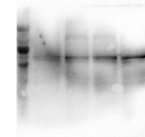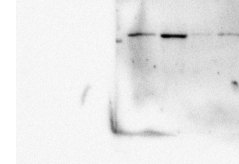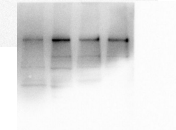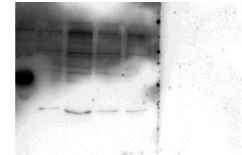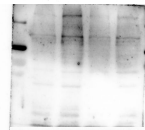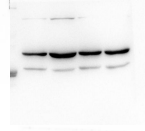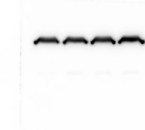

$\alpha$ -SMA

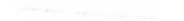

# Supplementary Figure2

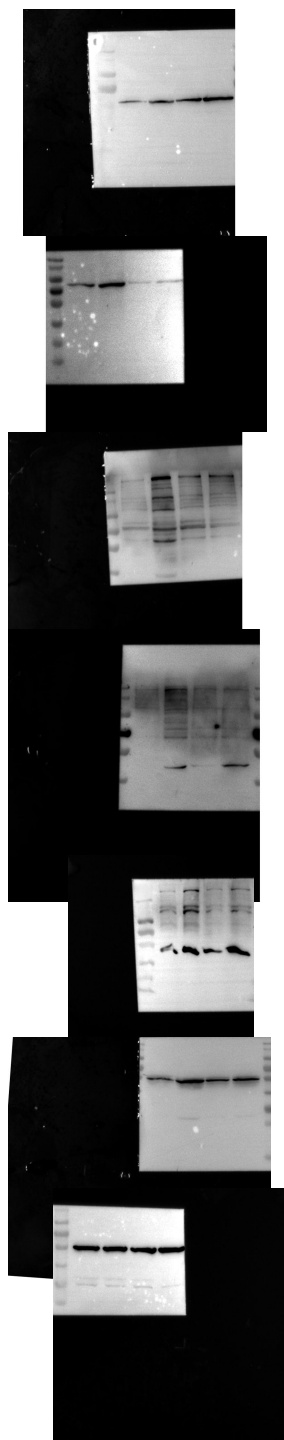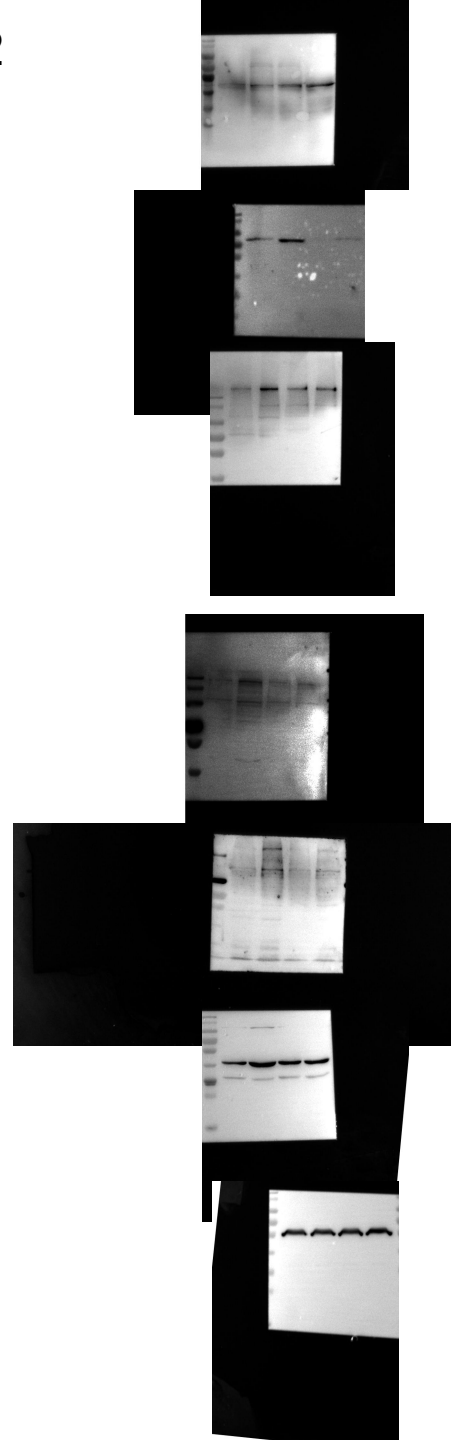

Supplementary Figure3

FN

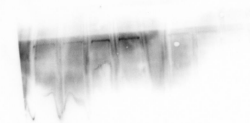

Col I

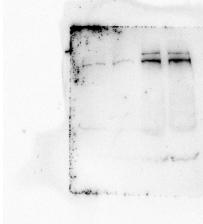

Col III

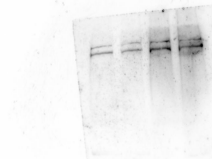

$\alpha$ -SMA

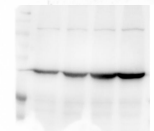

$\beta$ -Tubulin

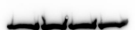

Atg7

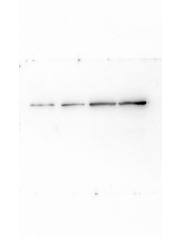

RAGE

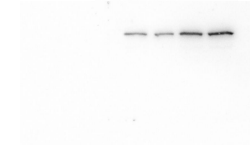

LC3

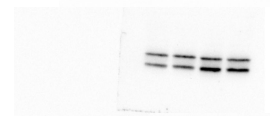

p62

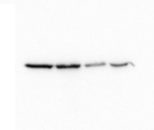

p-Stat3

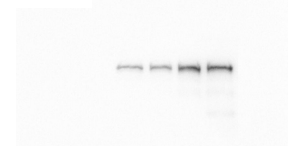

Stat3

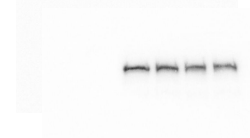

$\beta$ -Tubulin

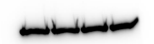

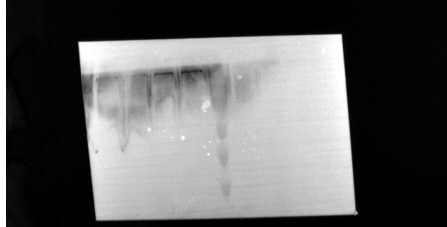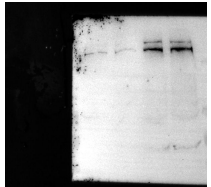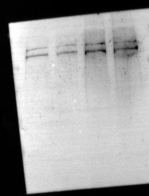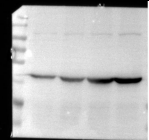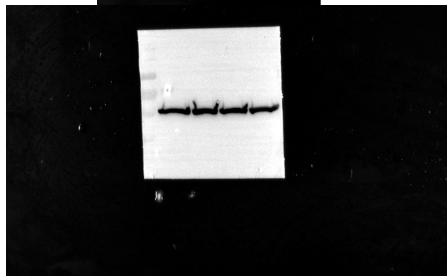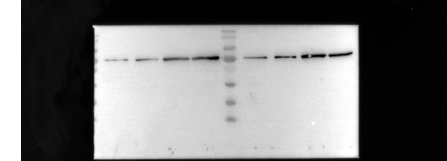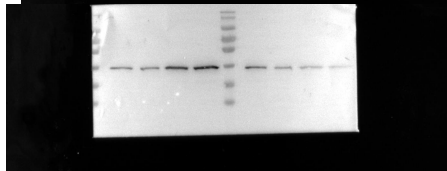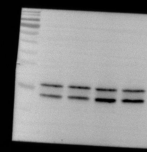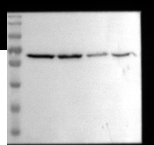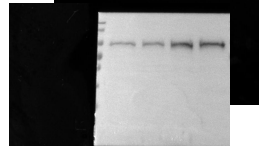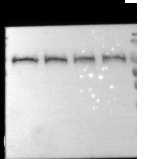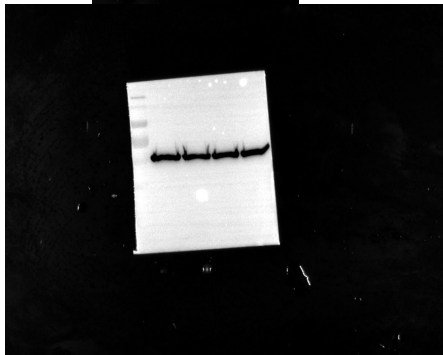

Supplementary Figure3
